# Supplementary material for: A semi-vapor electrolysis technology for hydrogen generation from wide water resources
Source: Royal Society of Chemistry journal article supplement (doi:10.1039/d4ee02722a), 2024-01-01
Supplement: d4ee02722a2.xlsx [file d4ee02722a2.xlsx]

## Sheet: SVE
Electrolyzer Single Cell 2 x 2 cm2	Temperature: 90 ℃	Anode: Vapor	Cathode: Deionized water liquid
Measurement 1			Measurement 2			Measurement 3
1.78523	19.2499		1.79142	19.046		1.77184	19.0375
1.7842	17.4712		1.7842	17.4843		1.7842	17.8588
1.77493	16.5612		1.77493	16.607		1.77493	17.1757
1.76566	15.8951		1.76566	16.0062		1.76566	16.6175
1.75639	15.2826		1.75639	15.4506		1.75536	16.0363
1.74608	14.6943		1.74608	14.8969		1.74608	15.4643
1.73681	14.1236		1.73681	14.3458		1.73681	14.8629
1.72754	13.5418		1.72754	13.785		1.72754	14.2648
1.71724	12.9763		1.71724	13.2221		1.71724	13.6562
1.7059	12.2984		1.7059	12.537		1.7059	12.9312
1.69663	11.7343		1.69663	11.9814		1.69663	12.3148
1.68736	11.1865		1.68633	11.4133		1.68633	11.7238
1.67706	10.6315		1.67706	10.8544		1.67706	11.1139
1.66778	10.0974		1.66778	10.3007		1.66778	10.5341
1.65851	9.55288		1.65851	9.75487		1.65748	9.93987
1.64821	9.03514		1.64821	9.2038		1.64821	9.35611
1.63894	8.49191		1.63894	8.66122		1.63894	8.76712
1.6276	7.88789		1.6276	8.02451		1.6276	8.08662
1.6173	7.36558		1.6173	7.50351		1.6173	7.52312
1.60803	6.85569		1.60803	6.99951		1.60803	6.97663
1.59875	6.39418		1.59875	6.48308		1.59875	6.43994
1.58845	5.89605		1.58845	6.00784		1.58845	5.91763
1.57918	5.445		1.57918	5.51298		1.57918	5.41166
1.56991	4.97041		1.56991	5.05474		1.56991	4.91223
1.5596	4.54419		1.5596	4.59584		1.56063	4.44091
1.55033	4.10164		1.55033	4.17093		1.55033	3.97613
1.539	3.63555		1.539	3.66365		1.539	3.47212
1.5287	3.21979		1.5287	3.26228		1.5287	3.05179
1.51942	2.88313		1.51942	2.89817		1.51942	2.68833
1.51015	2.51706		1.51015	2.54582		1.51015	2.3216
1.49985	2.20263		1.49985	2.21701		1.49985	2.01044
1.49058	1.89604		1.49058	1.91761		1.49058	1.6947
1.4813	1.64175		1.48027	1.63979		1.4813	1.43975
1.471	1.37308		1.471	1.38027		1.471	1.18219
1.45967	1.13578		1.45967	1.12794		1.45967	0.939016
1.44937	0.913522		1.44937	0.917444		1.44937	0.749442
1.44009	0.754018		1.44009	0.75794		1.44009	0.597783
1.43082	0.605627		1.43082	0.60432		1.42979	0.467696
1.42052	0.487307		1.42052	0.478809		1.42052	0.359181
1.41125	0.385329		1.41125	0.376177		1.41125	0.275507
1.40094	0.274199		1.40094	0.282044		1.40094	0.197716
1.39167	0.211444		1.39167	0.208175		1.39167	0.144112
1.38137	0.146727		1.38137	0.159147		1.38137	0.102425
1.37003	0.0923666		1.37003	0.101983		1.37003	0.0637667
1.35973	0.0615329		1.36076	0.0718721		1.36076	0.0426571
1.35046	0.0379464		1.35046	0.0489439		1.35046	0.0263608
1.34119	0.0245695		1.34119	0.0367541		1.34119	0.0165777
1.33088	0.014684		1.33088	0.0229186		1.33088	0.00905035
1.32161	0.00995179		1.32161	0.0183753		1.32161	0.00580211
1.31131	0.00620713		1.31131	0.0122994		1.31131	0.00279673
1.30101	0.00509039		1.30204	0.0116899		1.30101	0.00217644
1.28967	0.00415181		1.28967	0.00838783		1.28967	0.000908693
1.2804	0.00380673		1.2804	0.00878203		1.2804	0.000898173
1.2701	0.00405525		1.2701	0.00721203		1.2701	0.000563912
1.26083	0.00346734		1.26083	0.00775193		1.26083	0.000521015
1.25052	0.0041044		1.25052	0.00663521		1.25052	0.000402601
1.24125	0.00340856		1.24125	0.00666247		1.24125	0.000240987
1.23095	0.00403482		1.23095	0.0061933		1.23095	0.000365403
1.22168	0.00299363		1.22168	0.00607486		1.22168	0.000241563
1.21137	0.00378717		1.21137	0.00606437		1.21137	0.000684354
1.20004	0.00207691		1.20004	0.0053632		1.20004	-3.84036e-05

## Sheet: WLE
Electrolyzer Single Cell 2 x 2 cm2	Temperature: 90 ℃	Anode: Deionized water liquid	Cathode: Deionized water liquid
Measurement 1			Measurement 2			Measurement 3
V(V)	Current (I)		V(V)	Current (I)		V(V)	Current (I)
1.79554	18.1327		1.79554	18.1563		1.79554	17.8033
1.7842	17.0051		1.7842	17.0685		1.7842	16.6181
1.77493	16.3357		1.77493	16.3749		1.77493	15.9265
1.76566	15.7617		1.76566	15.7735		1.76566	15.3983
1.75639	15.2107		1.75639	15.1989		1.75639	14.861
1.74608	14.6511		1.74608	14.623		1.74608	14.3445
1.73681	14.087		1.73681	14.051		1.73681	13.7928
1.72754	13.5287		1.72754	13.4705		1.72754	13.2574
1.71724	12.9633		1.71724	12.8992		1.71724	12.6933
1.7059	12.2697		1.7059	12.2036		1.7059	12.0363
1.69663	11.7134		1.69663	11.6362		1.69663	11.4643
1.68736	11.1348		1.68736	11.074		1.68633	10.925
1.67706	10.5864		1.67706	10.5158		1.67706	10.3654
1.66778	10.0275		1.66778	9.95229		1.66778	9.83201
1.65851	9.45939		1.65851	9.39664		1.65851	9.27636
1.64821	8.91094		1.64821	8.84753		1.64821	8.75078
1.63894	8.37359		1.63894	8.29449		1.63894	8.20363
1.6276	7.71466		1.6276	7.65125		1.6276	7.5813
1.61833	7.18516		1.6173	7.11587		1.61833	7.05376
1.60803	6.6537		1.60803	6.60402		1.60803	6.54845
1.59875	6.15165		1.59875	6.08824		1.59875	6.03725
1.58948	5.64699		1.58948	5.59339		1.58845	5.55351
1.57918	5.17633		1.57918	5.11292		1.57918	5.07762
1.56991	4.69781		1.56991	4.65271		1.56991	4.61414
1.5596	4.26179		1.5596	4.20492		1.56063	4.1742
1.55033	3.81401		1.55033	3.77871		1.55033	3.74929
1.539	3.33549		1.539	3.27928		1.539	3.27797
1.52973	2.93543		1.52973	2.91124		1.52973	2.89163
1.51942	2.58635		1.51942	2.53863		1.51942	2.54974
1.51015	2.23793		1.51015	2.20132		1.51015	2.20459
1.49985	1.93134		1.49985	1.90846		1.49985	1.9163
1.49058	1.64436		1.49058	1.61233		1.49058	1.61625
1.4813	1.37634		1.4813	1.35346		1.4813	1.38157
1.471	1.16128		1.471	1.13513		1.471	1.13382
1.45967	0.897833		1.45967	0.889335		1.45967	0.9096
1.44937	0.737022		1.44937	0.716757		1.4504	0.726563
1.44009	0.576864		1.44009	0.578825		1.44009	0.584709
1.42979	0.454622		1.43082	0.439586		1.43082	0.455929
1.42052	0.347414		1.42052	0.343492		1.42052	0.35199
1.41125	0.259818		1.41125	0.253935		1.41125	0.26897
1.40094	0.195755		1.40094	0.195755		1.40094	0.195755
1.39167	0.138229		1.39167	0.132999		1.39167	0.142805
1.38137	0.0983992		1.38137	0.0951291		1.38137	0.101297
1.37003	0.0624446		1.37003	0.0595415		1.37003	0.0677707
1.35973	0.0434017		1.36076	0.0407576		1.35973	0.0460189
1.35046	0.0280984		1.35046	0.026609		1.35046	0.0332032
1.34119	0.0198533		1.34119	0.0187902		1.34119	0.0240515
1.33088	0.0138746		1.33088	0.011851		1.33088	0.0178462
1.32161	0.00960104		1.32161	0.00940138		1.32161	0.0148138
1.31131	0.00824689		1.31131	0.00746444		1.31131	0.0122509
1.30204	0.00668766		1.30204	0.00540337		1.30204	0.0117007
1.28967	0.00595414		1.28967	0.00537135		1.28967	0.0101578
1.2804	0.00576015		1.2804	0.00414129		1.2804	0.0103199
1.2701	0.00534495		1.2701	0.00474057		1.2701	0.00909531
1.26083	0.00519413		1.26083	0.00375874		1.26083	0.00957584
1.25052	0.00489764		1.25052	0.00439579		1.25052	0.00851309
1.24125	0.00482236		1.24125	0.00340316		1.24125	0.00911234
1.23095	0.00469316		1.23095	0.00397546		1.23095	0.00806036
1.22168	0.00435887		1.22168	0.00320408		1.22168	0.00875677
1.2124	0.00438075		1.21137	0.00368464		1.21137	0.00758607
1.20004	0.00394939		1.20004	0.00301045		1.20004	0.00780768

## Sheet: HFR
	High Frequency Resistance (HFR, Ohm)
	Test 1	Test 2
SVE	0.012781	0.01244
WLE	0.01326	0.013261
